# Supplementary material
Source: PubMed Central journal article supplement (PMC6699757)
Supplement: NIHMS1044386-supplement-Appendix.pdf [file NIHMS1044386-supplement-Appendix.pdf]

Appendix, Table 1. Sociodemographic characteristics of older adults with spine condition at baseline.

|                                                   | No.    | Mean or % (95% CI) |                   |                   |                             |
|---------------------------------------------------|--------|--------------------|-------------------|-------------------|-----------------------------|
|                                                   |        | Mean age in years  | % Female sex      | % Black race      | % with $\geq 1$ comorbidity |
| Resident of quintile 1, lowest                    |        |                    |                   |                   |                             |
| Moved yet remained within quintile 1              | 1,123  | 75.5 (75.1, 75.9)  | 67.5 (64.8, 70.2) | 15.3 (13.2, 17.4) | 40.6 (37.7, 43.5)           |
| Moved to area of higher chiropractic care         | 7,002  | 76.4 (76.3, 76.6)  | 68.3 (67.3, 69.4) | 8.3 (7.7, 8.9)    | 37.6 (36.5, 38.7)           |
| Resident of quintile 2                            |        |                    |                   |                   |                             |
| Moved to area of lower chiropractic care          | 1,672  | 75.8 (75.5, 76.1)  | 65.6 (63.3, 67.8) | 11.5 (10.0, 13.1) | 37.3 (34.9, 39.6)           |
| Moved yet remained within quintile 2              | 3,232  | 76.7 (76.5, 77.0)  | 68.3 (66.7, 69.9) | 6.9 (6.0, 7.8)    | 36.3 (34.7, 38.0)           |
| Moved to area of higher chiropractic care         | 10,356 | 77.0 (76.9, 77.2)  | 69.5 (68.6, 70.4) | 4.3 (3.9, 4.7)    | 34.7 (33.8, 35.6)           |
| Resident of quintile 3                            |        |                    |                   |                   |                             |
| Moved to area of lower chiropractic care          | 5,356  | 76.4 (76.3, 76.6)  | 67.6 (66.3, 68.8) | 6.6 (5.9, 7.2)    | 36.7 (35.4, 37.9)           |
| Moved yet remained within quintile 3              | 4,810  | 77.1 (76.9, 77.3)  | 69.9 (68.6, 71.2) | 3.8 (3.2, 4.3)    | 35.1 (33.7, 36.4)           |
| Moved to area of higher chiropractic care         | 9,208  | 77.1 (77.0, 77.3)  | 67.8 (66.8, 68.7) | 2.5 (2.2, 2.9)    | 33.6 (32.6, 34.5)           |
| Resident of quintile 4                            |        |                    |                   |                   |                             |
| Moved to area of lower chiropractic care          | 10,708 | 77.1 (76.9, 77.2)  | 68.8 (67.9, 69.7) | 4.1 (3.7, 4.5)    | 35.3 (34.4, 36.2)           |
| Moved yet remained within quintile 4              | 6,616  | 77.4 (77.3, 77.6)  | 68.6 (67.4, 69.7) | 2.1 (1.8, 2.5)    | 35.0 (33.8, 36.1)           |
| Moved to area of higher chiropractic care         | 5,243  | 77.6 (77.4, 77.8)  | 69.1 (67.8, 70.3) | 1.5 (1.2, 1.9)    | 34.6 (33.3, 35.9)           |
| Resident of quintile 5, highest chiropractic care |        |                    |                   |                   |                             |
| Moved to area of lower chiropractic care          | 13,378 | 77.0 (76.9, 77.2)  | 67.6 (66.8, 68.4) | 1.9 (1.7, 2.1)    | 35.3 (34.5, 36.2)           |
| Moved yet remained within quintile 4              | 5,975  | 77.6 (77.4, 77.8)  | 68.8 (67.6, 70.0) | 0.5 (0.4, 0.7)    | 35.0 (33.8, 36.2)           |

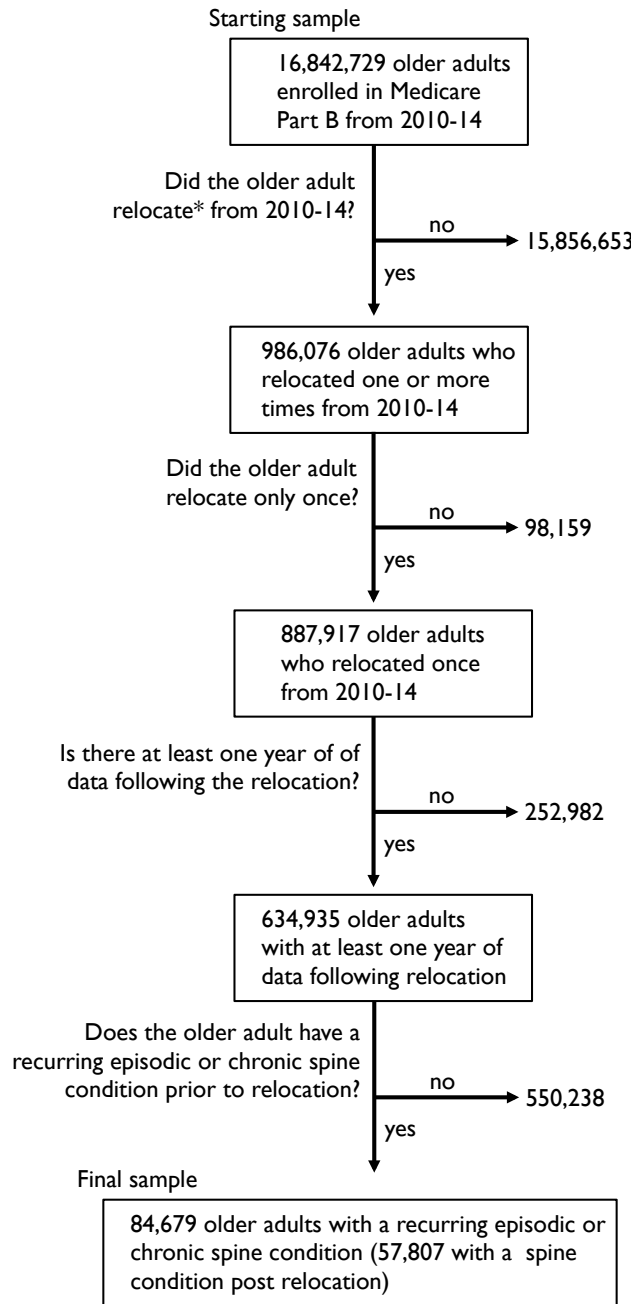

Appendix, Figure 1. Flow diagram of study inclusion for older adults.

\* Relocation defined as changing a Hospital Referral Region based on residential address in the Master Beneficiary Summary File

|                                          |  | Calendar Year |      |      |      |      | Included in study?        |
|------------------------------------------|--|---------------|------|------|------|------|---------------------------|
|                                          |  | 2010          | 2011 | 2012 | 2013 | 2014 |                           |
| Hospital Referral Region<br>of residence |  | 34            | 34   | 89   | 89   | 89   | Yes                       |
|                                          |  | 18            | 90   | 90   | 90   | 90   | Yes                       |
|                                          |  | 93            | 93   | 93   | 93   | 93   | No (did not move)         |
|                                          |  | 290           | 290  | 290  | 290  | 07   | No (no follow-up data)    |
|                                          |  | 62            | 09   | 09   | 09   | 77   | No (moved multiple times) |
|                                          |  | ...           |      |      |      |      |                           |

  

|                  |                       |                         |
|------------------|-----------------------|-------------------------|
| Baseline<br>year | Year of<br>relocation | Post-relocation<br>year |
| ■                | ■                     | ■                       |

Appendix, Figure 2. Identification of baseline and post relocation year based on change in Hospital Referral Region of residence.

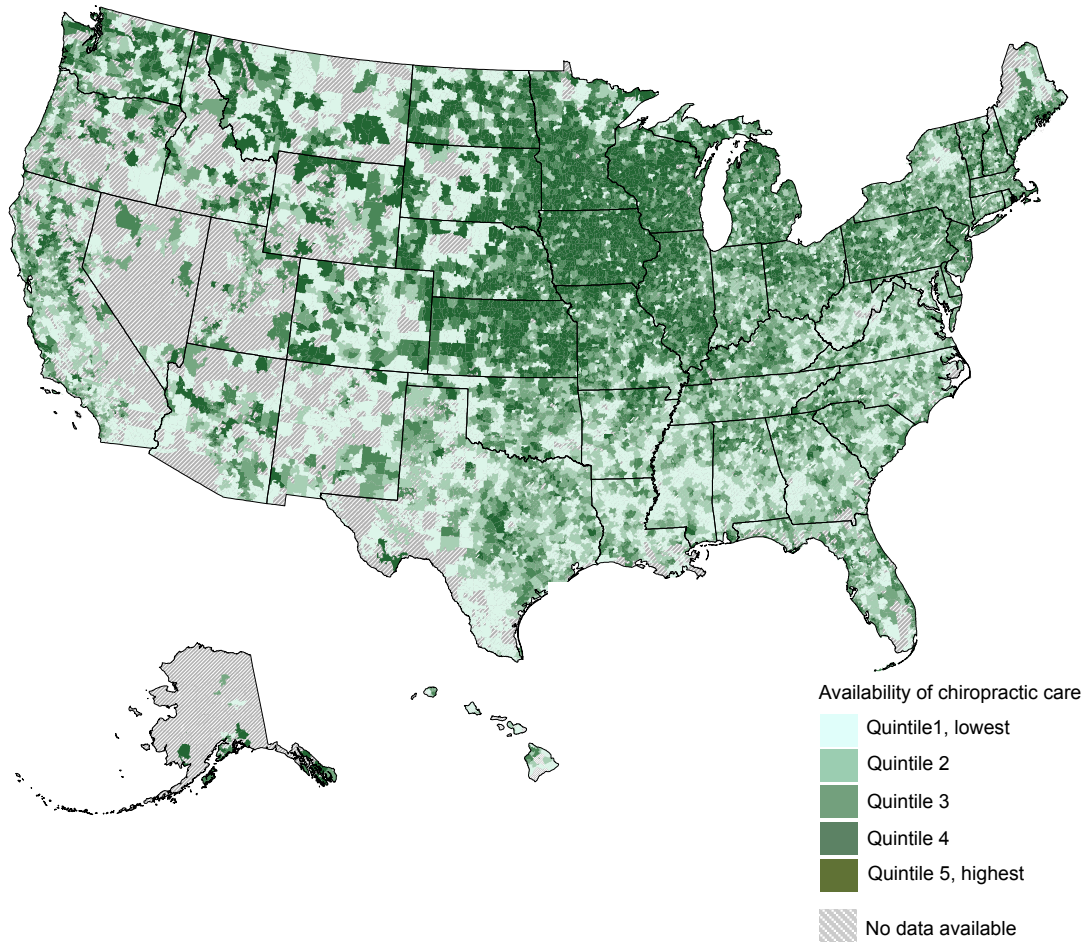

Appendix, Figure 3. Unadjusted geographic variation in the availability of chiropractic care across U.S. ZIP Code Tabulation Areas
